# Supplementary material for: Fast Synthesis of Co3O4 by Microwave-Assisted Hydrothermal Treatment
Source: Hindawi journal article supplement (doi:10.1155/2020/2535019), 2020-01-04
Supplement: f1 [file 2535019.f1.pdf]

**Manuscript: Fast synthesis of  $\text{Co}_3\text{O}_4$  by microwave-assisted hydrothermal treatment**

Midilane Sena Medina et al.

Supplementary material:

Scanning electron microscopy of  $\text{Co}_3\text{O}_4$  nanoparticles:

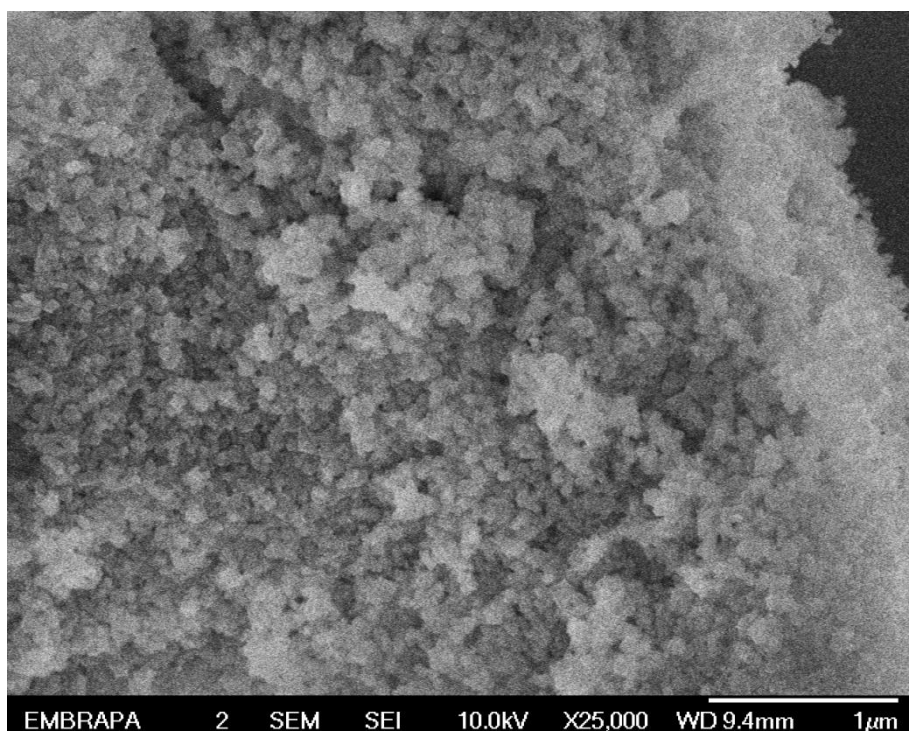

CH2-10

CH2-60

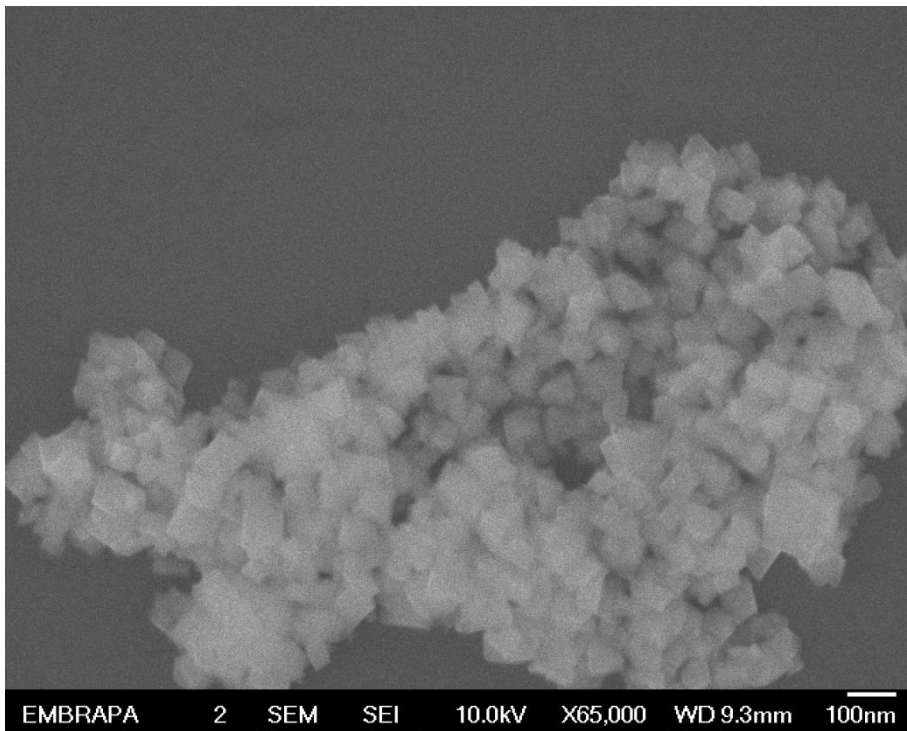

Magnetic data:

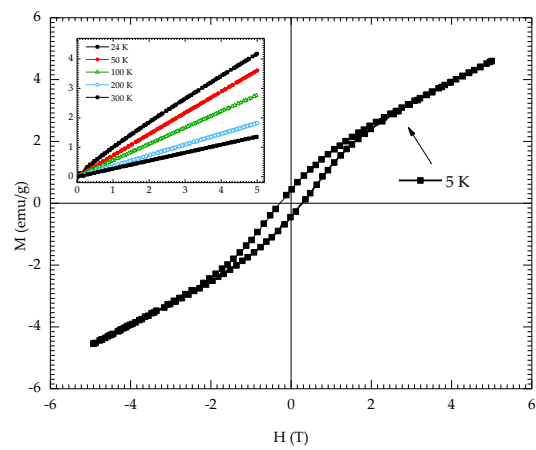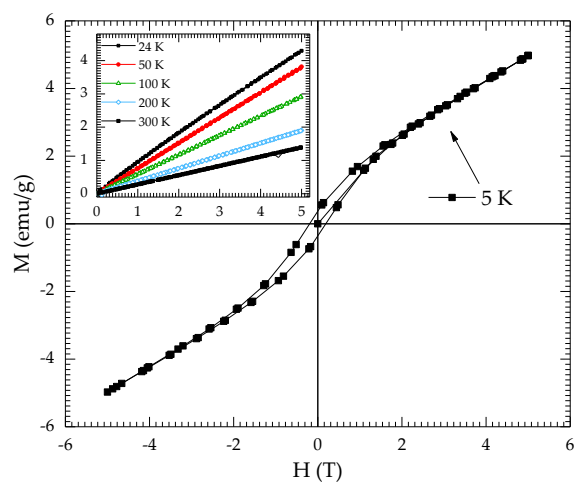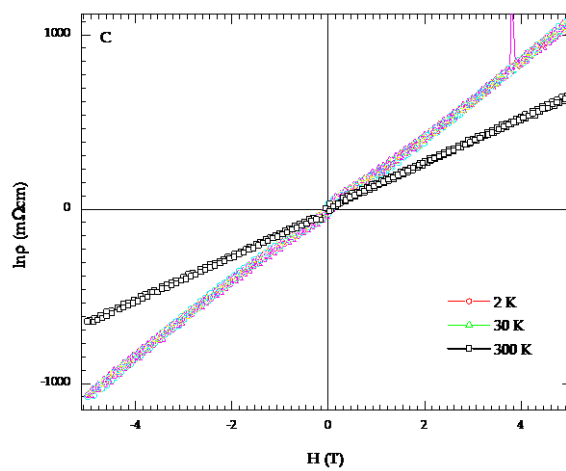

MxH curves for samples synthesized at 240 °C during 60 min (top) and 10 min (bottom) and (C) synthesized with urea.
